# Supplementary material for: Elevated gold ellipse nanoantenna dimers as sensitive and tunable surface enhanced Raman spectroscopy substrates
Source: Royal Society of Chemistry journal article supplement (doi:10.1039/c5nr08920d), 2016-01-01
Supplement: c5nr08920d1.pdf [file c5nr08920d1.pdf]

**Supporting Information for “Elevated Gold Ellipse Nanoantenna Dimers as Sensitive and Tunable Surface Enhanced Raman Spectroscopy Substrates”**

Aaron M. Jubb,<sup>1,†,\*</sup> Yang Jiao,<sup>1,†</sup> Gyula Eres,<sup>2,3</sup> Scott T. Retterer,<sup>2</sup> and Baohua Gu<sup>1,\*</sup>

<sup>1</sup>Environmental Sciences Division, <sup>2</sup>Center for Nanophase Materials Sciences,  
<sup>3</sup>Materials Science and Technology Division, Oak Ridge National Laboratory,  
Oak Ridge, TN 37831, USA

\* Corresponding author's emails: gub1@ornl.gov and jubbam@ornl.gov

† These authors contributed equally.

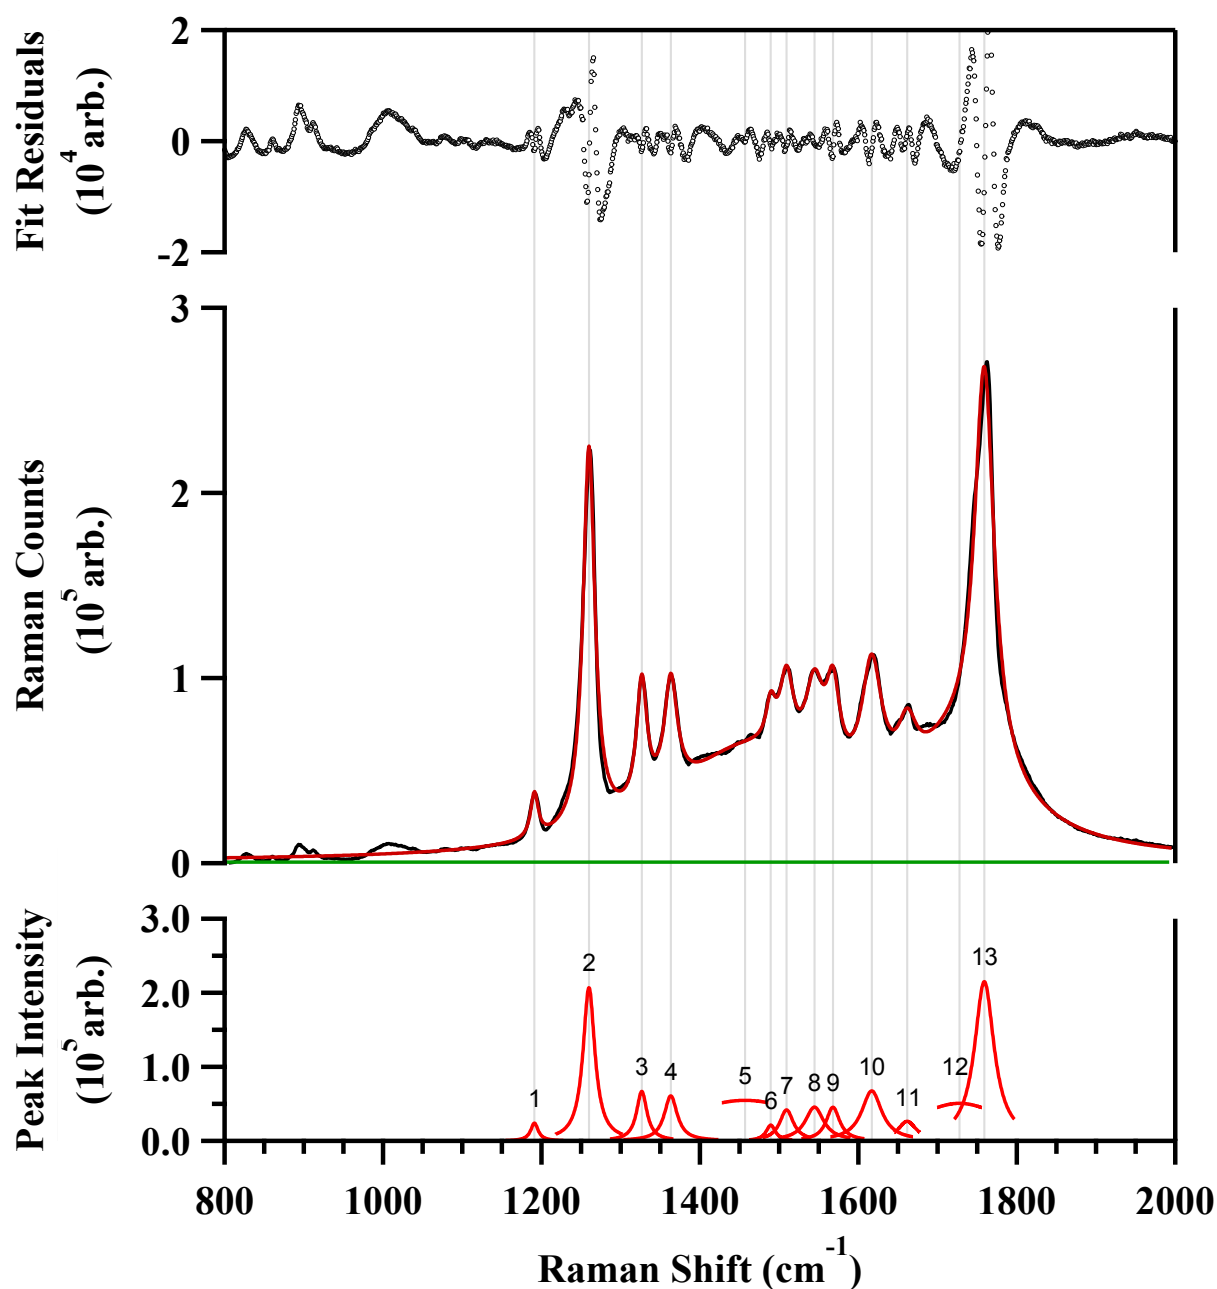

**Figure S1.** Fitting analysis of a representative SERS spectrum of *p*MA adsorbed on an elevated Au ellipse dimer substrate (1.3 aspect ratio, 10 nm nanogap, 100 nm post height, 0° polarization) collected with one 10 s scan and 1 mW 785 nm excitation. Top panel: Fit residuals (*red markers*). Middle panel: raw data (*black trace*), composite fit (*red trace*), and baseline (*green trace*). Bottom panel: Lorentzian peak components (*red traces*) with corresponding peak number. Solid grey lines indicate fit peak centers. Peak 13 area used for enhancement factor determination.

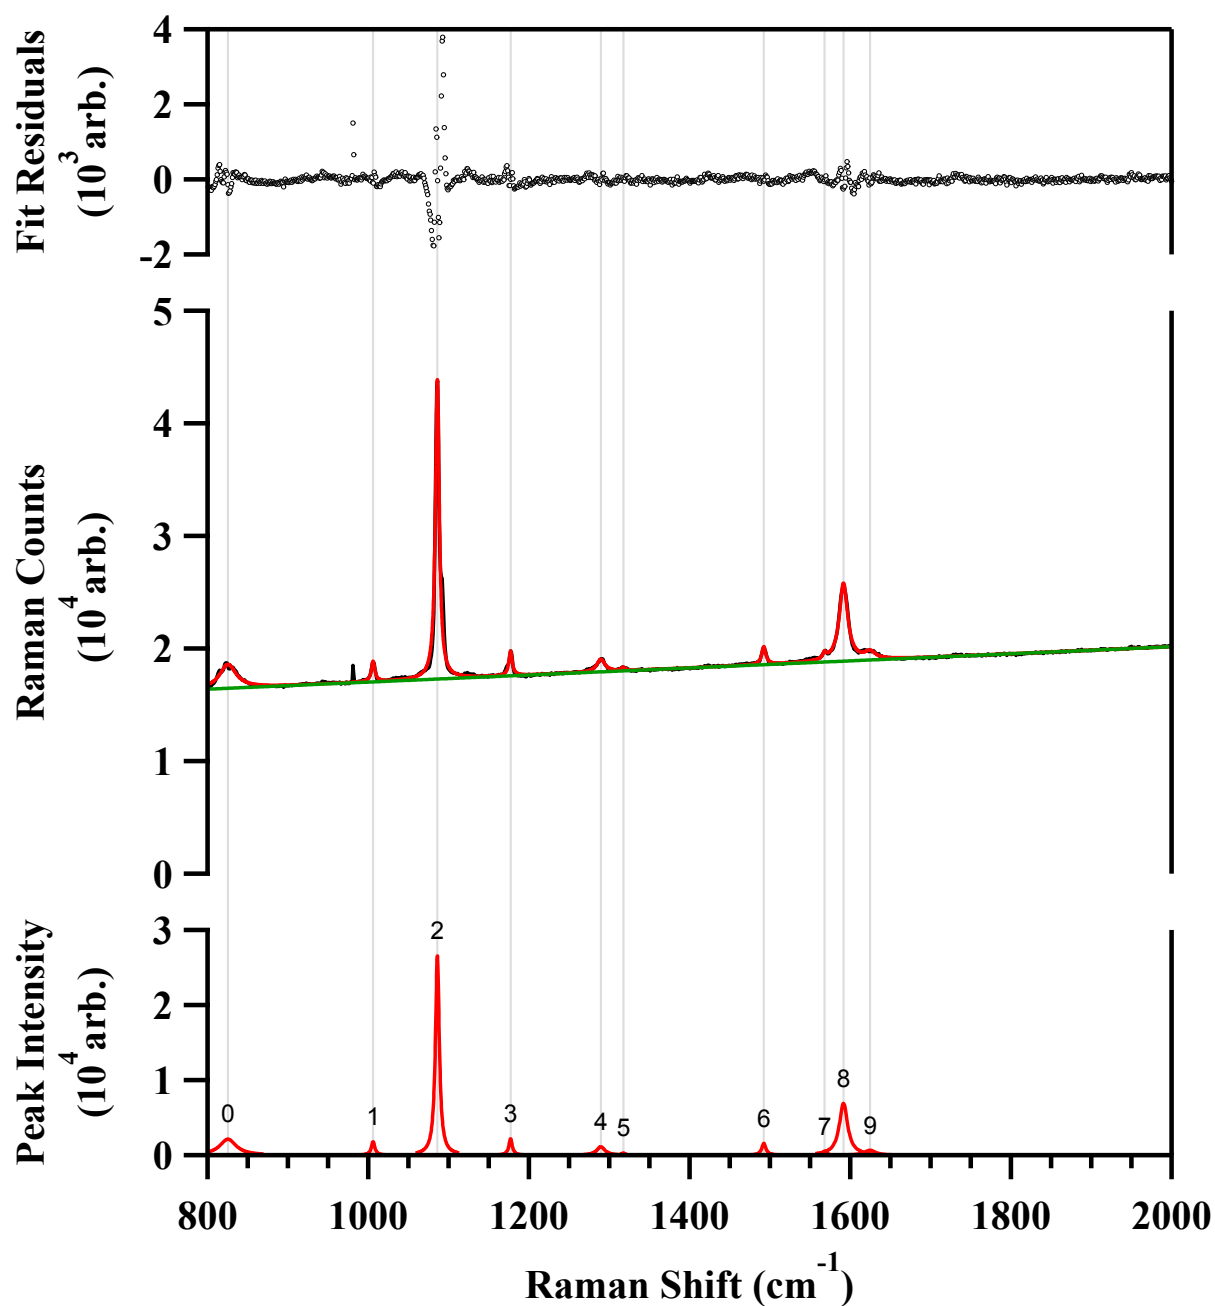

**Figure S2.** Fitting analysis of a representative spectrum of a *pMA* particle on Au mirror collected with one 10 s scan and 1 mW 785 nm excitation. Top panel: Fit residuals (*red markers*). Middle panel: raw data (*black trace*), composite fit (*red trace*), and baseline (*green trace*). Bottom panel: Lorentzian peak components (*red traces*) with corresponding peak number. Solid grey lines indicate fit peak centers. Peak eight area used for enhancement factor determinations.

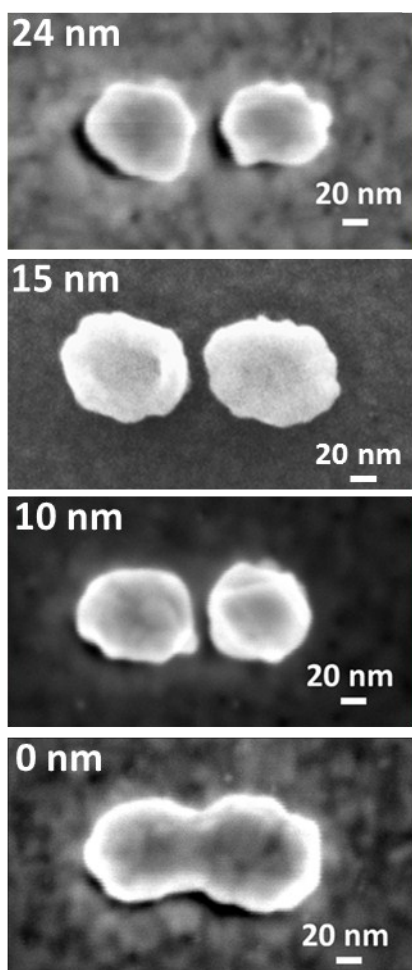

**Figure S3.** SEM images of single elevated Au ellipse dimers (1.3:1 aspect ratio, 100 nm post height) with 0 nm, 10 nm, 15 nm, and 24 nm gap sizes.

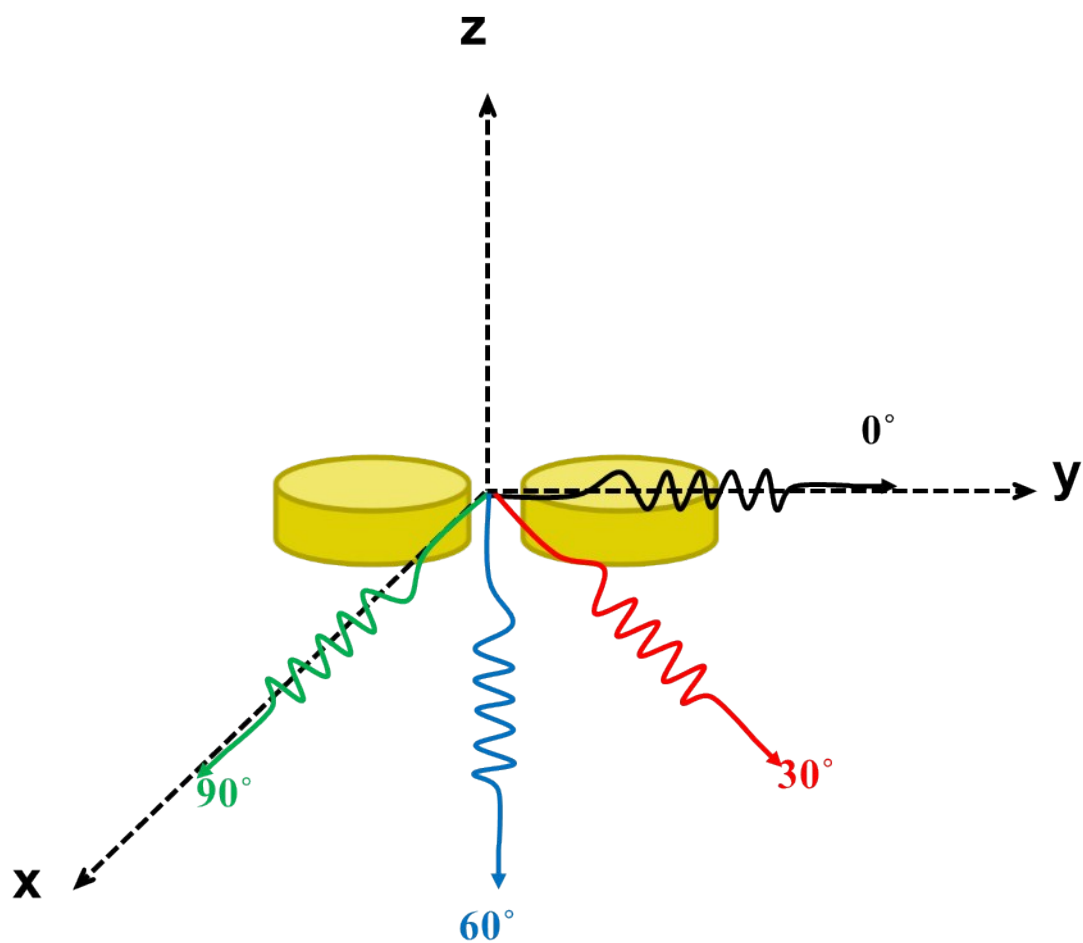

**Figure S4.** Schematic illustrating the polarization orientation relative to an elevated Au ellipse dimer.
